# Supplementary material for: A leptospiral AAA+ chaperone–Ntn peptidase complex, HslUV, contributes to the intracellular survival of Leptospira interrogans in hosts and the transmission of leptospirosis
Source: PubMed Central journal article supplement (PMC5717094; doi:10.1038/emi.2017.93), 2017-11-29
Supplement: emi201793x6.pdf [file emi201793x6.pdf]

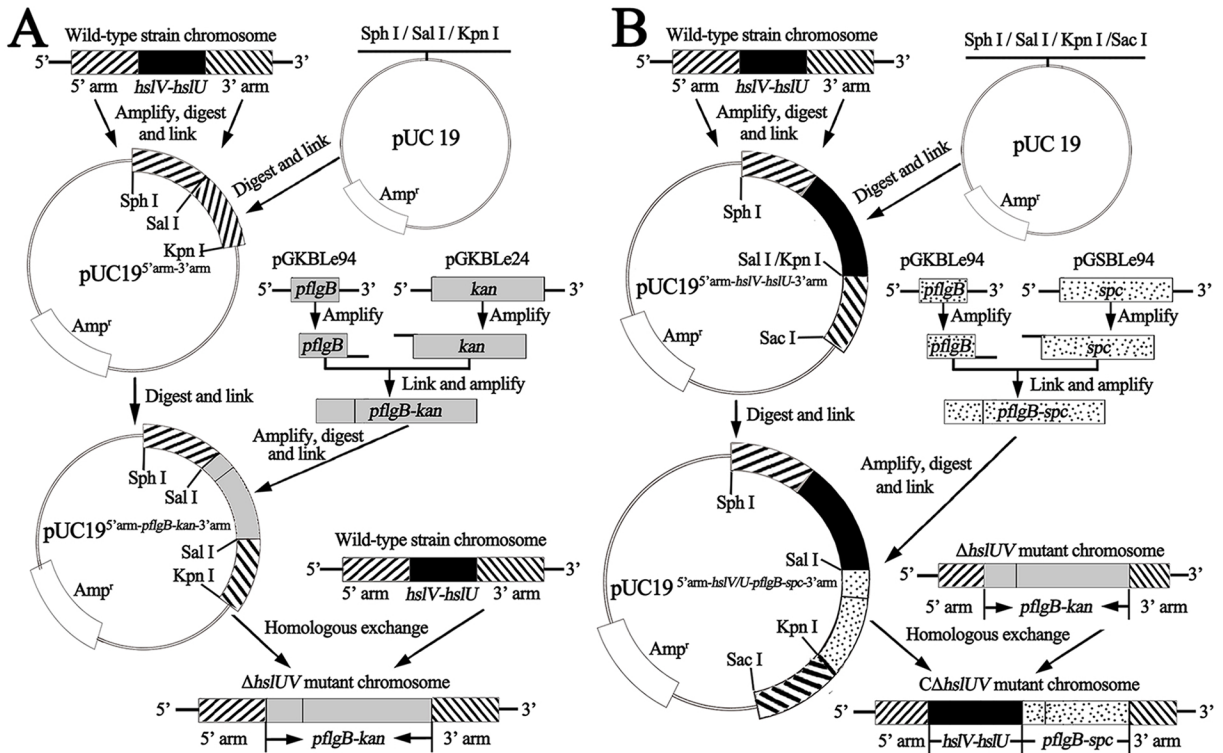

Supplementary Figure S1 Strategies for generating the  $\Delta hslUV$  and  $C\Delta hslUV$  mutants. **(A)** Strategy for generation of the  $\Delta hslUV$  mutant derived from wild-type *L. interrogans* strain Lai. See section of materials and methods in text for details. **(B)** Strategy for generation of the  $C\Delta hslUV$  mutant derived from the  $\Delta hslUV$  mutant. See section of materials and methods in text for details.
