# Supplementary material for: A leptospiral AAA+ chaperone–Ntn peptidase complex, HslUV, contributes to the intracellular survival of Leptospira interrogans in hosts and the transmission of leptospirosis
Source: PubMed Central journal article supplement (PMC5717094; doi:10.1038/emi.2017.93), 2017-11-29
Supplement: emi201793x8.pdf [file emi201793x8.pdf]

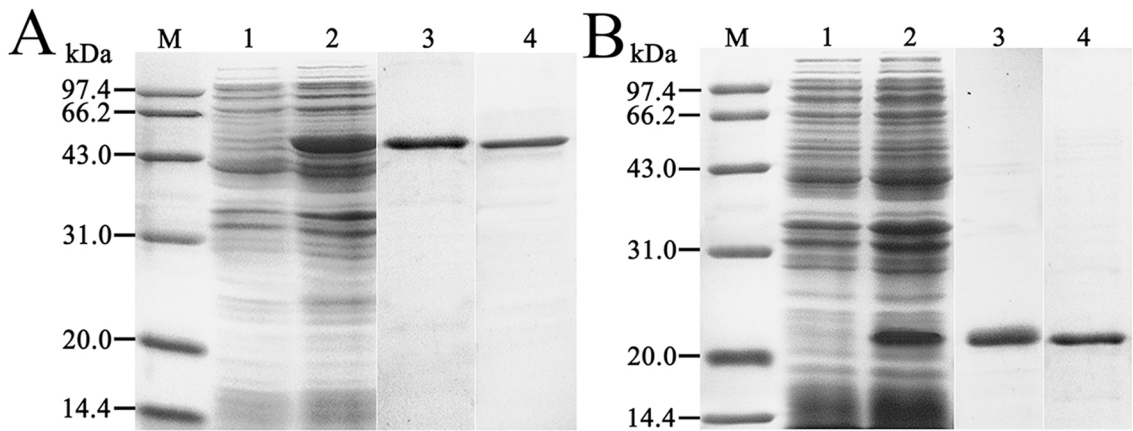

Supplementary Figure S3 Expression and extraction of leptospiral r/nHslU and r/nHslV proteins. **(A)** Expression and purity of r/nHslU proteins from *L. interrogans* strains Lai, determined by SDS-PAGE. Lane M: protein marker (Fermentas, USA). Lane 1: wild-type *E. coli* BL21DE3 for control. Lanes 2 and 3: the expressed rHslU (~55 kDa) by *E. coli* BL21DE3<sup>pET42a-hslU</sup> and the extracted rHslU by Ni-NTA affinity chromatography, respectively. Lane 4: the extracted nHslU (~55 kDa) by rHslU-IgG-coated affinity chromatography. **(B)** Expression and purity of r/nHslV proteins from *L. interrogans* strains Lai, determined by SDS-PAGE. The legend is the same as shown in **A** but for examination of the expression and extraction of rHslV and nHslV (~21 kDa).
