# Supplementary material for: A leptospiral AAA+ chaperone–Ntn peptidase complex, HslUV, contributes to the intracellular survival of Leptospira interrogans in hosts and the transmission of leptospirosis
Source: PubMed Central journal article supplement (PMC5717094; doi:10.1038/emi.2017.93), 2017-11-29
Supplement: emi201793x9.pdf [file emi201793x9.pdf]

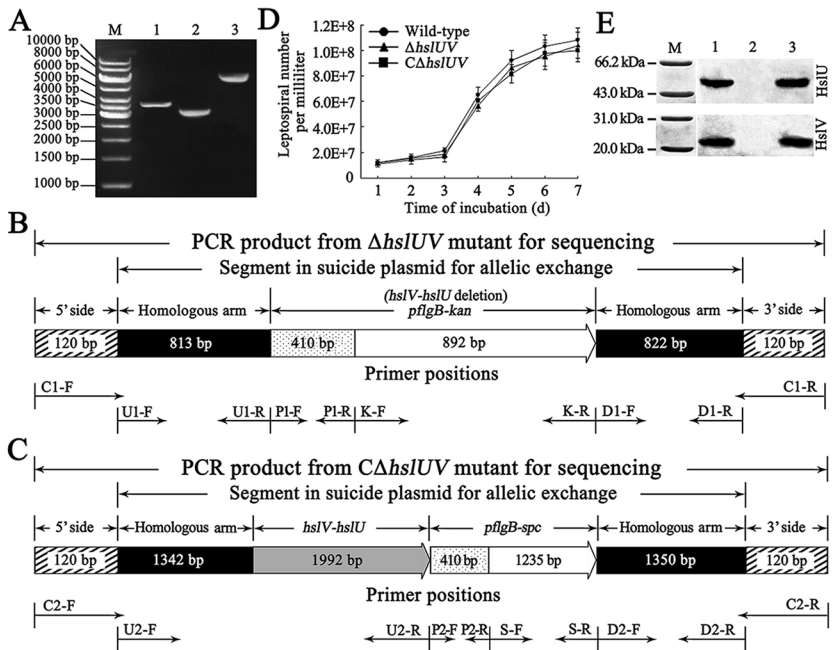

Supplementary Figure S4 Characterization of the  $\Delta hslUV$  and  $C\Delta hslUV$  mutants. (A) Identification of the  $\Delta hslUV$  and  $C\Delta hslUV$  mutants by PCR. Lane M: DNA marker (Fermentas, USA). Lane 1: amplicon (3867 bp) of the 5'arm-*hslV/U*-3'arm (3627 bp) plus two extending regions (120 bp each) from wild-type *L. interrogans* strain Lai for control. Lane 2: amplicon (3189 bp) of the 5'arm-*pflgB-kan*-3'arm segment (2949 bp) plus two extending regions (120 bp each) from the  $\Delta hslUV$  mutant for identification. Lane 3: amplicon (6581 bp) of the 5'arm-*hslV/U-pflgB-spc*-3'arm (6341 bp) plus two extending regions (120 bp each) from the  $C\Delta hslUV$  mutant for identification. (B) Schematic diagram of sequencing result of the  $\Delta hslUV$  mutant. The positions of PCR primers used are marked below. (C) Schematic diagram of sequencing result of the  $C\Delta hslUV$  mutant. The positions of PCR primers used are marked below. (D) Growth curves of the  $\Delta hslUV$  and  $C\Delta hslUV$  mutants compared to wild-type *L. interrogans* strain Lai in EMJH liquid medium. (E) Absence of HslU and HslV proteins in the  $\Delta hslUV$  mutant, determined by Western Blot assay. Lane M: protein marker. Lane 1: HslU or HslV protein expressed by wild-type *L. interrogans* strain Lai. Lane 2: absence of HslU or HslV protein in the  $\Delta hslUV$  mutant. Lane 3: HslU or HslV protein expressed by the  $C\Delta hslUV$  mutant.
